# Supplementary material for: Schistosoma sex-biased microRNAs regulate ovarian development and egg production by targeting Wnt signaling pathway
Source: PubMed Central journal article supplement — Commun Biol. 2024 Dec 31;7:1717. doi: 10.1038/s42003-024-07402-z (PMC11688426; doi:10.1038/s42003-024-07402-z), 2024-12-31
Supplement: 42003_2024_7402_MOESM2_ESM.pdf [file 42003_2024_7402_MOESM2_ESM.pdf]

## Supplementary information

*Schistosoma* sex-biased microRNAs regulate ovarian development and egg production by targeting Wnt signaling pathway

Pengfei Du<sup>1,2,3†</sup>, Tianqi Xia<sup>2†</sup>, Xuxin Li<sup>2†</sup>, Bikash R. Giri<sup>1</sup>, Chuantao Fang<sup>1</sup>, Shun Li<sup>2</sup>, Shi Yan<sup>4</sup>, Guofeng Cheng<sup>1,2,5\*</sup>

Correspondence: [cheng\\_guofeng@foxmail.com](mailto:cheng_guofeng@foxmail.com)

Supplementary Figures  
Supplementary Table 1-10

## Supplementary Figure 1

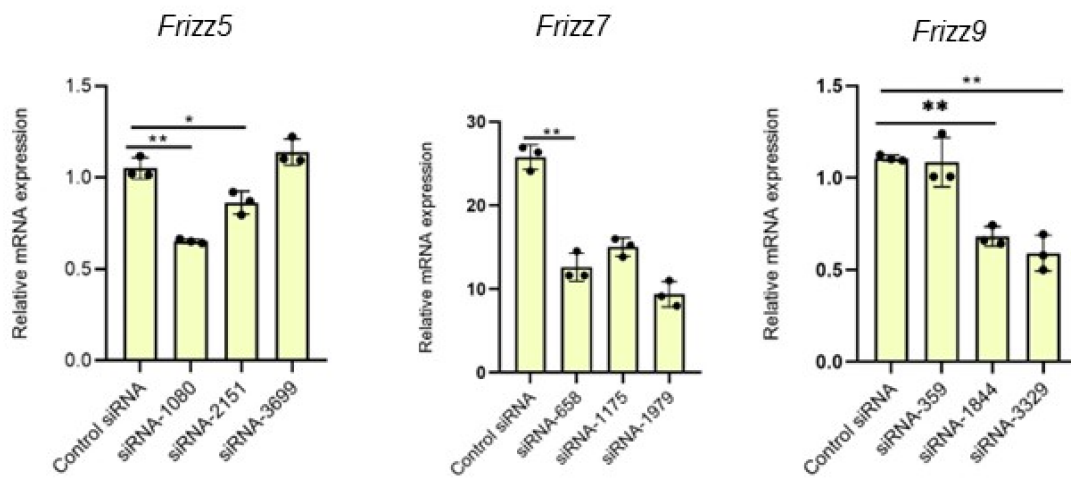

Supplementary Figure 1. Screening of best siRNA for inhibiting *Frizzled-5, 7 and 9*. Data are shown as the mean  $\pm$  standard error and represent triplicate experiments' results. \* denotes  $P \leq 0.05$  and \*\* denotes  $P \leq 0.001$ .

Supplementary Figure 2

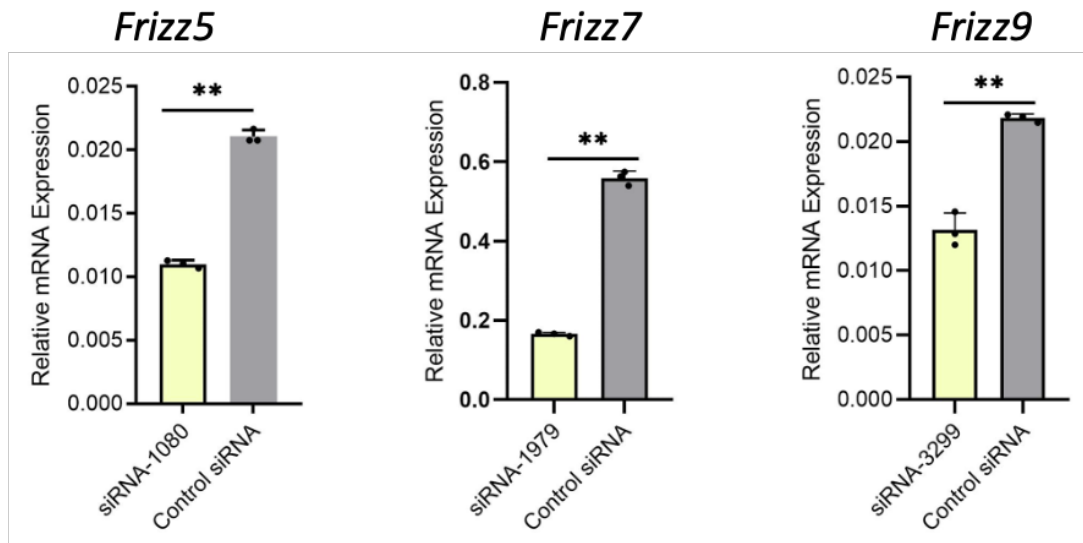

Supplementary Figure 2. RT-qPCR analysis of mRNA suppression induced by the best selected siRNA for *Frizzled-5/7/9*.

Data are shown as the mean  $\pm$  standard error and represent triplicate experiments' results.

\*\* denotes  $P \leq 0.001$ .

**Supplementary Figure 3**

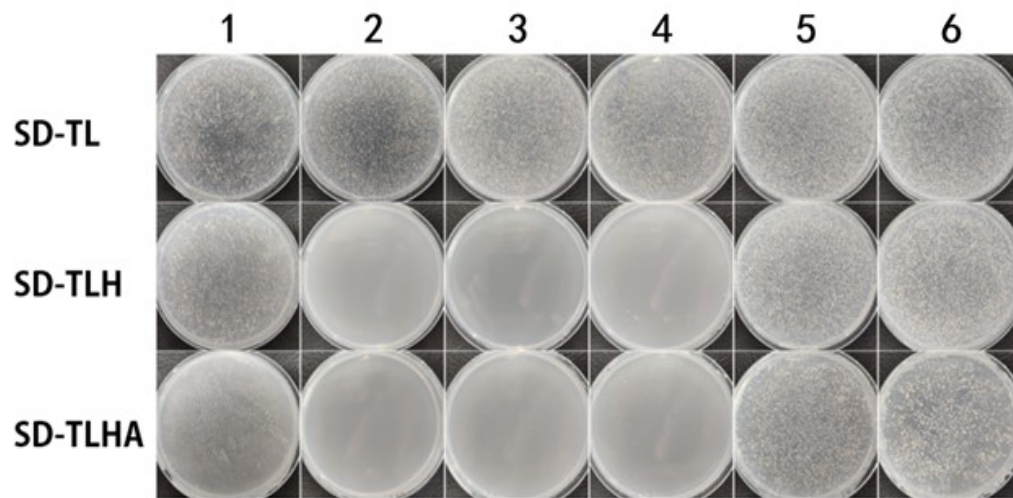

Supplementary Figure 3. Evaluation of self-activity of SjFrizzled-7 bait plasmid in Yeast cells.

### Supplementary Figure 4

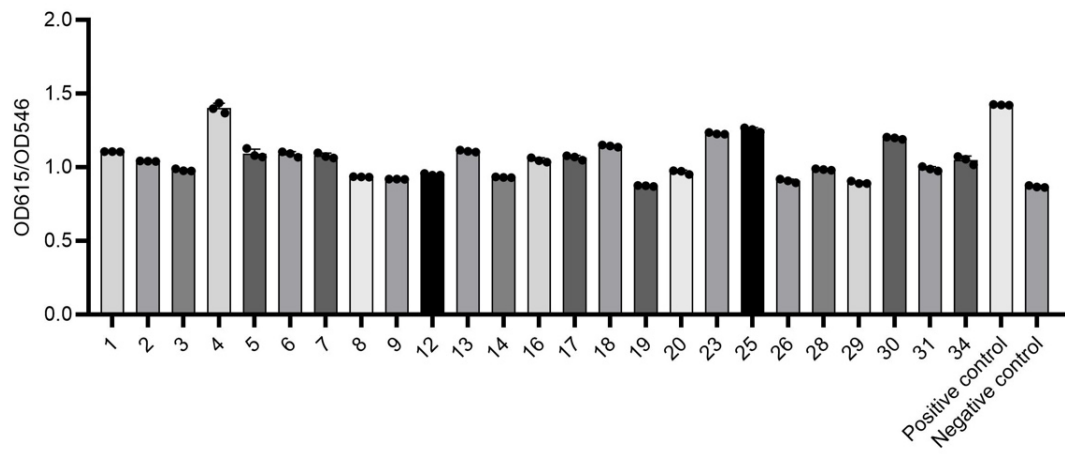

Supplementary Figure 4. Validation of the interaction between bait and pray plasmid by  $\beta$ -galactosidase activity.

### Supplementary Figure 5

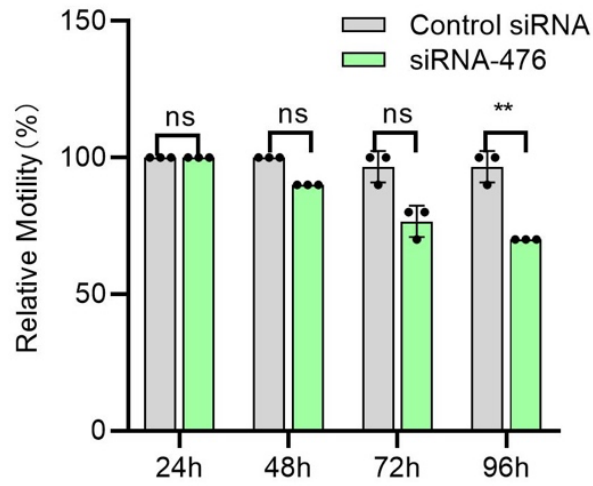

Supplementary Figure 5. *SjRho* inhibition induced reduced worm viability at day 4 of post treatment.

Data are shown as the mean  $\pm$  standard error and represent triplicate experiments' results.

\*  $P \leq 0.05$  and \*\*  $P \leq 0.001$ .
