# Supplementary material for: Schistosoma sex-biased microRNAs regulate ovarian development and egg production by targeting Wnt signaling pathway
Source: PubMed Central journal article supplement — Commun Biol. 2024 Dec 31;7:1717. doi: 10.1038/s42003-024-07402-z (PMC11688426; doi:10.1038/s42003-024-07402-z), 2024-12-31
Supplement: 42003_2024_7402_MOESM3_ESM.pdf [file 42003_2024_7402_MOESM3_ESM.pdf]

## Description of Additional Supplementary Files

**File name:** Supplementary Data 1

**Description:** This Excel file contains 10 Supplementary Tables.

Supplementary Table 1. The list of miRNA mimics and antisense.

Supplementary Table 2. List of primers for validating RNA-seq results.

Supplementary Table 3. List of the primers for constructing recombinant plasmids.

Supplementary Table 4. List of siRNAs used for target silencing.

Supplementary Table 5. List of primers used for RT-qPCR analysis.

Supplementary Table 6. List of predicted targets in upregulated genes for *Bantam* and *miR-1989*.

Supplementary Table 7. GO enrichment analysis of DEGs in the parasites treated with *Bantam* inhibitor.

Supplementary Table 8. KEGG enrichment analysis of DEGs in the parasites treated with *Bantam* inhibitor.

Supplementary Table 9. GO enrichment analysis of DEGs in the parasites treated with *miR-1989* inhibitor.

Supplementary Table 10. KEGG enrichment analysis of DEGs in the parasites treated with *miR-1989* inhibitor.

**File name:** Supplementary Data 2

**Description:** The source data behind the graphs in the paper, this Excel file contains 9 Supplementary Tables.

Supplementary Table 1. The source data of Fig 1c and 1e.

Supplementary Table 2. The source data of Fig 2g.

Supplementary Table 3. The source data of Fig 3e and 3f.

Supplementary Table 4. The source data of Fig 4a, 4c and 4d.

Supplementary Table 5. The source data of Fig 6a, 6b and 6d.

Supplementary Table 6. The source data of Fig 7c.

Supplementary Table 7. The source data of Fig 8b.

Supplementary Table 8. The source data of S Fig 1, S Fig 2, S Fig 4 and S Fig 5.
